# Supplementary material for: A Surprisingly High Enhancing Potential of Nitric Acid in Sulfuric Acid–Methylamine Nucleation
Source: MDPI journal article supplement (doi:10.3390/atmos15040467), 2024-04-10
Supplement: s1 [file s1]

# A Surprisingly High Enhancing Potential of Nitric Acid in Sulfuric Acid–Methylamine Nucleation

Fukang Qiao, Rongjie Zhang, Qiaojing Zhao, Fangfang Ma, Jingwen Chen and Hong-Bin Xie \*

**Table S1.** Cluster formation rates ( $J$ ,  $\text{cm}^{-3} \text{s}^{-1}$ ) of NA-SA-MA system and SA-MA system, and the enhancement factor  $r$  at different temperatures (K) and precursor concentrations (molecules  $\text{cm}^{-3}$ ).

**Table S2.** Cluster formation rates ( $J$ ,  $\text{cm}^{-3} \text{s}^{-1}$ ) of NA-SA-DMA system and SA-DMA system, and the enhancement factor  $r$  at different temperatures (K) and precursor concentrations (molecules  $\text{cm}^{-3}$ ).

**Table S3.** Cluster formation rates ( $J$ ,  $\text{cm}^{-3} \text{s}^{-1}$ ) of NA-SA-A system and SA-A system, and the enhancement factor  $r$  at different temperatures (K) and precursor concentrations (molecule  $\text{cm}^{-3}$ ).

**Table S4.** Coordinates of all optimized  $(\text{NA})_x(\text{SA})_y(\text{MA})_z$  ( $1 \leq x, 1 \leq y, x + y \leq 3, 1 \leq z \leq 3$ ),  $(\text{NA})_x(\text{SA})_y(\text{DMA})_z$  ( $1 \leq x, 1 \leq y, 1 \leq z \leq x + y \leq 3$ ) and  $(\text{NA})_x(\text{SA})_y(\text{A})_z$  ( $1 \leq x, 1 \leq y, 1 \leq z \leq x + y \leq 3$ ) clusters.

**Table S5.** Single point energies ( $\text{kcal mol}^{-1}$ ) at the DLPNO-CCSD(T)/aug-cc-pVTZ level and the corresponding Gibbs free energy correction  $G_{\text{corr}}$  ( $\text{kcal mol}^{-1}$ ) and Gibbs free energy  $G$  ( $\text{kcal mol}^{-1}$ ) at 298.15 K for all the most stable configurations of the NA-SA-MA, NA-SA-DMA and NA-SA-A systems.

**Figure S1.** Lowest Gibbs free energy conformations of the  $(\text{NA})_{1-3}(\text{MA})_{1-3}$  clusters calculated at the DLPNO-CCSD(T)/aug-cc-pVTZ// $\omega\text{B97X-D}/6-31++\text{G(d,p)}$  level of theory, 298.15 K and 1 atm. The dashed red lines indicate hydrogen bonds.

**Figure S2.** Formation free energy ( $\Delta G$ ) of (A)  $(\text{NA})_x(\text{SA})_y(\text{MA})_z$  ( $1 \leq x, 1 \leq y, x + y \leq 3, 1 \leq z \leq 3$ ), (B)  $(\text{NA})_x(\text{SA})_y(\text{A})_z$  ( $x \geq 1, y \geq 1, 1 \leq z \leq x + y \leq 3$ ) and (C)  $(\text{NA})_x(\text{SA})_y(\text{DMA})_z$  ( $x \geq 1, y \geq 1, 1 \leq z \leq x + y \leq 3$ ) clusters calculated at the DLPNO-CCSD(T)/aug-cc-pVTZ// $\omega\text{B97X-D}/6-31++\text{G(d,p)}$  level of theory, 298.15 K and 1 atm.

**Figure S3.** Cluster growth pathways for the NA-SA-MA system at (A) 238.15 K,  $[\text{NA}] = 10^{10}$  molecules  $\text{cm}^{-3}$ ,  $[\text{SA}] = 10^6$  molecules  $\text{cm}^{-3}$  and  $[\text{MA}] = 10^8$  molecules  $\text{cm}^{-3}$ , (B) 278.15 K,  $[\text{NA}] = 10^{12}$  molecules  $\text{cm}^{-3}$ ,  $[\text{SA}] = 10^6$  molecules  $\text{cm}^{-3}$  and  $[\text{MA}] = 10^8$  molecules  $\text{cm}^{-3}$ .

**Table S1.** Cluster formation rates ( $J$ ,  $\text{cm}^{-3} \text{s}^{-1}$ ) of NA-SA-MA system and SA-MA system, and the enhancement factor  $r$  at different temperatures (K) and precursor concentrations ( $\text{molecules cm}^{-3}$ ).

| T      | [NA]     | [SA]     | [MA]     | $J_{\text{NA-SA-MA}}$ | $J_{\text{SA-MA}}$ | $r$      |
|--------|----------|----------|----------|-----------------------|--------------------|----------|
| 238.15 | 1.00E+10 | 1.00E+06 | 1.00E+08 | 3.41E-01              | 8.93E-05           | 3818.8   |
| 238.15 | 1.00E+10 | 1.00E+06 | 1.00E+09 | 3.88E+01              | 2.70E-03           | 14369.1  |
| 238.15 | 1.00E+10 | 1.00E+07 | 1.00E+08 | 1.76E+02              | 6.37E-01           | 276.1    |
| 238.15 | 1.00E+10 | 1.00E+07 | 1.00E+09 | 5.13E+03              | 1.72E+01           | 297.6    |
| 258.15 | 1.00E+10 | 1.00E+06 | 1.00E+08 | 2.15E-03              | 2.75E-07           | 7796.5   |
| 258.15 | 1.00E+10 | 1.00E+06 | 1.00E+09 | 1.44E-01              | 2.91E-05           | 4942.9   |
| 258.15 | 1.00E+10 | 1.00E+07 | 1.00E+08 | 1.43E+00              | 2.15E-03           | 662.4    |
| 258.15 | 1.00E+10 | 1.00E+07 | 1.00E+09 | 7.90E+01              | 2.20E-01           | 359.7    |
| 278.15 | 1.00E+10 | 1.00E+06 | 1.00E+08 | 1.26E-05              | 8.03E-10           | 15698.5  |
| 278.15 | 1.00E+10 | 1.00E+06 | 1.00E+09 | 9.40E-04              | 1.27E-07           | 7391.2   |
| 278.15 | 1.00E+10 | 1.00E+07 | 1.00E+08 | 9.41E-03              | 6.70E-06           | 1404.1   |
| 278.15 | 1.00E+10 | 1.00E+07 | 1.00E+09 | 6.81E-01              | 9.99E-04           | 682.1    |
| 298.15 | 1.00E+10 | 1.00E+06 | 1.00E+08 | 1.83E-09              | 8.46E-14           | 21570.9  |
| 298.15 | 1.00E+10 | 1.00E+06 | 1.00E+09 | 9.03E-07              | 6.29E-11           | 14370.1  |
| 298.15 | 1.00E+10 | 1.00E+07 | 1.00E+08 | 1.70E-06              | 8.33E-10           | 2036.2   |
| 298.15 | 1.00E+10 | 1.00E+07 | 1.00E+09 | 7.73E-04              | 5.78E-07           | 1337.5   |
| 278.15 | 1.00E+08 | 1.00E+06 | 1.00E+08 | 1.59E-07              | 8.03E-10           | 197.6    |
| 278.15 | 1.00E+08 | 1.00E+06 | 1.00E+09 | 2.01E-05              | 1.27E-07           | 157.9    |
| 278.15 | 1.00E+08 | 1.00E+07 | 1.00E+08 | 1.25E-04              | 6.70E-06           | 18.7     |
| 278.15 | 1.00E+08 | 1.00E+07 | 1.00E+09 | 1.58E-02              | 9.99E-04           | 15.8     |
| 278.15 | 1.00E+09 | 1.00E+06 | 1.00E+08 | 1.39E-06              | 8.03E-10           | 1731.5   |
| 278.15 | 1.00E+09 | 1.00E+06 | 1.00E+09 | 1.57E-04              | 1.27E-07           | 1231.7   |
| 278.15 | 1.00E+09 | 1.00E+07 | 1.00E+08 | 1.05E-03              | 6.70E-06           | 156.5    |
| 278.15 | 1.00E+09 | 1.00E+07 | 1.00E+09 | 1.17E-01              | 9.99E-04           | 117.0    |
| 278.15 | 1.00E+11 | 1.00E+06 | 1.00E+08 | 8.87E-05              | 8.03E-10           | 110366.9 |
| 278.15 | 1.00E+11 | 1.00E+06 | 1.00E+09 | 5.84E-03              | 1.27E-07           | 45913.6  |
| 278.15 | 1.00E+11 | 1.00E+07 | 1.00E+08 | 6.46E-02              | 6.70E-06           | 9630.9   |
| 278.15 | 1.00E+11 | 1.00E+07 | 1.00E+09 | 3.83E+00              | 9.99E-04           | 3838.0   |
| 278.15 | 1.00E+12 | 1.00E+06 | 1.00E+08 | 6.76E-04              | 8.03E-10           | 841918.9 |
| 278.15 | 1.00E+12 | 1.00E+06 | 1.00E+09 | 1.26E-01              | 1.27E-07           | 993776.4 |
| 278.15 | 1.00E+12 | 1.00E+07 | 1.00E+08 | 4.55E-01              | 6.70E-06           | 67895.6  |
| 278.15 | 1.00E+12 | 1.00E+07 | 1.00E+09 | 3.63E+01              | 9.99E-04           | 36335.5  |

**Table S2.** Cluster formation rates ( $J$ ,  $\text{cm}^{-3} \text{s}^{-1}$ ) of NA-SA-DMA system and SA-DMA system, and the enhancement factor  $r$  at different temperatures (K) and precursor concentrations ( $\text{molecules cm}^{-3}$ ).

| T      | [NA]     | [SA]     | [DMA]    | $J_{\text{NA-SA-DMA}}$ | $J_{\text{SA-DMA}}$ | $r$  |
|--------|----------|----------|----------|------------------------|---------------------|------|
| 238.15 | 1.00E+10 | 1.00E+06 | 1.00E+08 | 6.24E+01               | 3.06E+01            | 2.0  |
| 238.15 | 1.00E+10 | 1.00E+06 | 1.00E+09 | 3.35E+04               | 1.23E+04            | 2.7  |
| 238.15 | 1.00E+10 | 1.00E+07 | 1.00E+08 | 2.61E+04               | 2.46E+04            | 1.1  |
| 238.15 | 1.00E+10 | 1.00E+07 | 1.00E+09 | 7.63E+05               | 6.49E+05            | 1.2  |
| 258.15 | 1.00E+10 | 1.00E+06 | 1.00E+08 | 1.70E+01               | 1.60E+01            | 1.1  |
| 258.15 | 1.00E+10 | 1.00E+06 | 1.00E+09 | 9.64E+03               | 8.58E+03            | 1.1  |
| 258.15 | 1.00E+10 | 1.00E+07 | 1.00E+08 | 1.98E+04               | 1.97E+04            | 1.0  |
| 258.15 | 1.00E+10 | 1.00E+07 | 1.00E+09 | 6.25E+05               | 6.16E+05            | 1.0  |
| 278.15 | 1.00E+10 | 1.00E+06 | 1.00E+08 | 2.32E-01               | 2.29E-01            | 1.0  |
| 278.15 | 1.00E+10 | 1.00E+06 | 1.00E+09 | 6.83E+01               | 6.43E+01            | 1.1  |
| 278.15 | 1.00E+10 | 1.00E+07 | 1.00E+08 | 1.17E+03               | 1.17E+03            | 1.0  |
| 278.15 | 1.00E+10 | 1.00E+07 | 1.00E+09 | 9.61E+04               | 9.56E+04            | 1.0  |
| 298.15 | 1.00E+10 | 1.00E+06 | 1.00E+08 | 2.20E-03               | 2.19E-03            | 1.0  |
| 298.15 | 1.00E+10 | 1.00E+06 | 1.00E+09 | 1.84E-01               | 1.82E-01            | 1.0  |
| 298.15 | 1.00E+10 | 1.00E+07 | 1.00E+08 | 1.57E+01               | 1.57E+01            | 1.0  |
| 298.15 | 1.00E+10 | 1.00E+07 | 1.00E+09 | 1.02E+03               | 1.02E+03            | 1.0  |
| 278.15 | 1.00E+08 | 1.00E+06 | 1.00E+08 | 2.29E-01               | 2.29E-01            | 1.0  |
| 278.15 | 1.00E+08 | 1.00E+06 | 1.00E+09 | 6.43E+01               | 6.43E+01            | 1.0  |
| 278.15 | 1.00E+08 | 1.00E+07 | 1.00E+08 | 1.17E+03               | 1.17E+03            | 1.0  |
| 278.15 | 1.00E+08 | 1.00E+07 | 1.00E+09 | 9.56E+04               | 9.56E+04            | 1.0  |
| 278.15 | 1.00E+09 | 1.00E+06 | 1.00E+08 | 2.29E-01               | 2.29E-01            | 1.0  |
| 278.15 | 1.00E+09 | 1.00E+06 | 1.00E+09 | 6.47E+01               | 6.43E+01            | 1.0  |
| 278.15 | 1.00E+09 | 1.00E+07 | 1.00E+08 | 1.17E+03               | 1.17E+03            | 1.0  |
| 278.15 | 1.00E+09 | 1.00E+07 | 1.00E+09 | 9.57E+04               | 9.56E+04            | 1.0  |
| 278.15 | 1.00E+11 | 1.00E+06 | 1.00E+08 | 2.54E-01               | 2.29E-01            | 1.1  |
| 278.15 | 1.00E+11 | 1.00E+06 | 1.00E+09 | 1.11E+02               | 6.43E+01            | 1.7  |
| 278.15 | 1.00E+11 | 1.00E+07 | 1.00E+08 | 1.18E+03               | 1.17E+03            | 1.0  |
| 278.15 | 1.00E+11 | 1.00E+07 | 1.00E+09 | 1.00E+05               | 9.56E+04            | 1.0  |
| 278.15 | 1.00E+12 | 1.00E+06 | 1.00E+08 | 7.08E-01               | 2.29E-01            | 3.1  |
| 278.15 | 1.00E+12 | 1.00E+06 | 1.00E+09 | 1.56E+03               | 6.43E+01            | 24.2 |
| 278.15 | 1.00E+12 | 1.00E+07 | 1.00E+08 | 1.30E+03               | 1.17E+03            | 1.1  |
| 278.15 | 1.00E+12 | 1.00E+07 | 1.00E+09 | 1.46E+05               | 9.56E+04            | 1.5  |

**Table S3.** Cluster formation rates ( $J$ ,  $\text{cm}^{-3} \text{s}^{-1}$ ) of NA-SA-A system and SA-A system, and the enhancement factor  $r$  at different temperatures (K) and precursor concentrations (molecule  $\text{cm}^{-3}$ ).

| T      | [NA]     | [SA]     | [A]      | $J_{\text{NA-SA-A}}$ | $J_{\text{SA-A}}$ | $r$   |
|--------|----------|----------|----------|----------------------|-------------------|-------|
| 238.15 | 1.00E+10 | 1.00E+06 | 1.00E+10 | 6.35E-03             | 5.51E-05          | 115.3 |
| 238.15 | 1.00E+10 | 1.00E+07 | 1.00E+10 | 8.85E+00             | 4.36E-01          | 20.3  |
| 258.15 | 1.00E+10 | 1.00E+06 | 1.00E+10 | 9.79E-09             | 4.82E-09          | 2.0   |
| 258.15 | 1.00E+10 | 1.00E+07 | 1.00E+10 | 6.10E-05             | 4.13E-05          | 1.5   |
| 278.15 | 1.00E+10 | 1.00E+06 | 1.00E+10 | 1.53E-14             | 1.42E-14          | 1.1   |
| 278.15 | 1.00E+10 | 1.00E+07 | 1.00E+10 | 1.43E-10             | 1.42E-10          | 1.0   |
| 298.15 | 1.00E+10 | 1.00E+06 | 1.00E+10 | 8.76E-20             | 8.58E-20          | 1.0   |
| 298.15 | 1.00E+10 | 1.00E+07 | 1.00E+10 | 8.58E-16             | 8.58E-16          | 1.0   |
| 278.15 | 1.00E+08 | 1.00E+06 | 1.00E+10 | 1.42E-14             | 1.42E-14          | 1.0   |
| 278.15 | 1.00E+08 | 1.00E+07 | 1.00E+10 | 1.42E-10             | 1.42E-10          | 1.0   |
| 278.15 | 1.00E+09 | 1.00E+06 | 1.00E+10 | 1.42E-14             | 1.42E-14          | 1.0   |
| 278.15 | 1.00E+09 | 1.00E+07 | 1.00E+10 | 1.42E-10             | 1.42E-10          | 1.0   |
| 278.15 | 1.00E+11 | 1.00E+06 | 1.00E+10 | 1.09E-13             | 1.42E-14          | 7.7   |
| 278.15 | 1.00E+11 | 1.00E+07 | 1.00E+10 | 1.56E-10             | 1.42E-10          | 1.1   |
| 278.15 | 1.00E+12 | 1.00E+06 | 1.00E+10 | 9.47E-12             | 1.42E-14          | 665.8 |
| 278.15 | 1.00E+12 | 1.00E+07 | 1.00E+10 | 1.13E-09             | 1.42E-10          | 7.9   |

**Table S4.** Coordinates of all optimized  $(\text{NA})_x(\text{SA})_y(\text{MA})_z$  ( $1 \leq x, 1 \leq y, x + y \leq 3, 1 \leq z \leq 3$ ),  $(\text{NA})_x(\text{SA})_y(\text{DMA})_z$  ( $1 \leq x, 1 \leq y, 1 \leq z \leq x + y \leq 3$ ) and  $(\text{NA})_x(\text{SA})_y(\text{A})_z$  ( $1 \leq x, 1 \leq y, 1 \leq z \leq x + y \leq 3$ ) clusters.

|                                           |           |           |           |
|-------------------------------------------|-----------|-----------|-----------|
| $(\text{NA})_1(\text{SA})_1(\text{MA})_1$ |           |           |           |
| S                                         | -1.763993 | -0.540643 | -0.095694 |
| O                                         | -1.313723 | -0.549069 | 1.483712  |
| O                                         | -2.313648 | 0.815115  | -0.333043 |
| H                                         | -1.021023 | 1.789988  | -0.665148 |
| H                                         | -1.989379 | -1.030175 | 1.979839  |
| O                                         | -0.443346 | -0.651846 | -0.776703 |
| O                                         | -2.68498  | -1.643031 | -0.265959 |
| O                                         | 2.262357  | 0.553079  | -0.329879 |
| O                                         | 1.80602   | -1.582745 | -0.053336 |
| H                                         | 0.889422  | -1.215771 | -0.311821 |
| O                                         | 3.804684  | -0.847613 | 0.264068  |
| N                                         | 2.675333  | -0.571573 | -0.037919 |
| N                                         | -0.037345 | 2.176958  | -0.631046 |
| C                                         | 0.231219  | 2.725458  | 0.721369  |
| H                                         | 0.577717  | 1.365048  | -0.799787 |
| H                                         | -0.417295 | 3.583327  | 0.895225  |
| H                                         | 1.279944  | 3.008782  | 0.797977  |
| H                                         | 0.004713  | 1.942588  | 1.444791  |
| H                                         | 0.107649  | 2.864945  | -1.36631  |
| $(\text{NA})_1(\text{SA})_1(\text{MA})_2$ |           |           |           |
| S                                         | -2.070602 | 0.00165   | -0.061157 |
| O                                         | -3.502245 | 0.001971  | 0.705947  |
| O                                         | -2.052668 | 1.236009  | -0.877959 |
| H                                         | -0.541036 | 2.06901   | -0.691216 |
| H                                         | -4.203162 | 0.005274  | 0.03993   |
| O                                         | -1.091968 | -0.001457 | 1.027829  |
| O                                         | -2.055126 | -1.229922 | -0.882169 |
| O                                         | 1.759748  | -0.001126 | -0.884451 |
| O                                         | 3.325614  | -1.088074 | 0.150571  |
| H                                         | 0.746068  | -3.058054 | -1.126769 |
| O                                         | 3.326918  | 1.086244  | 0.148171  |
| N                                         | 2.845344  | -0.001014 | -0.171682 |
| N                                         | 0.443924  | -2.329564 | -0.484318 |
| C                                         | 0.597968  | -2.743503 | 0.932289  |
| H                                         | 1.021824  | -1.466373 | -0.675212 |
| H                                         | 0.033214  | -3.65942  | 1.10694   |
| H                                         | 0.19957   | -1.938149 | 1.548238  |
| H                                         | 1.656853  | -2.891848 | 1.139581  |
| H                                         | -0.5449   | -2.065391 | -0.692312 |

---

|                                                       |           |           |           |
|-------------------------------------------------------|-----------|-----------|-----------|
| N                                                     | 0.448737  | 2.329884  | -0.483578 |
| C                                                     | 0.605692  | 2.737219  | 0.934686  |
| H                                                     | 1.024238  | 1.46598   | -0.678393 |
| H                                                     | 0.04432   | 3.654354  | 1.113798  |
| H                                                     | 1.665397  | 2.880681  | 1.141318  |
| H                                                     | 0.205021  | 1.930582  | 1.547501  |
| H                                                     | 0.752043  | 3.060352  | -1.123217 |
| (NA) <sub>1</sub> (SA) <sub>1</sub> (MA) <sub>3</sub> |           |           |           |
| N                                                     | -1.736883 | 1.925536  | -0.012661 |
| O                                                     | -0.981804 | 1.732943  | -1.040375 |
| O                                                     | -1.322028 | 2.656133  | 0.896729  |
| O                                                     | -2.830094 | 1.353411  | 0.032356  |
| H                                                     | -1.320236 | -0.004745 | -1.40304  |
| S                                                     | 1.892678  | -1.082733 | -0.125394 |
| O                                                     | 1.037196  | -0.476175 | 0.910374  |
| O                                                     | 1.18066   | -1.971136 | -1.061223 |
| O                                                     | 2.869605  | -2.051404 | 0.742993  |
| O                                                     | 2.767744  | -0.100082 | -0.795741 |
| H                                                     | 0.556048  | 2.103577  | -0.449669 |
| H                                                     | 3.424233  | -2.54835  | 0.12642   |
| N                                                     | -1.468211 | -1.027577 | -1.31065  |
| C                                                     | -2.544379 | -1.499663 | -2.197125 |
| H                                                     | -0.558823 | -1.490582 | -1.465564 |
| H                                                     | -3.456823 | -0.954597 | -1.954186 |
| H                                                     | -2.700903 | -2.567608 | -2.04139  |
| H                                                     | -2.279008 | -1.319032 | -3.239249 |
| H                                                     | -1.705564 | -1.186278 | -0.27567  |
| N                                                     | 1.450366  | 2.182544  | 0.099127  |
| C                                                     | 1.817489  | 3.589451  | 0.344299  |
| H                                                     | 1.25386   | 1.661908  | 0.958991  |
| H                                                     | 2.010982  | 4.076396  | -0.611189 |
| H                                                     | 2.710457  | 3.634531  | 0.967896  |
| H                                                     | 0.979189  | 4.076988  | 0.840976  |
| H                                                     | 2.169526  | 1.615014  | -0.380699 |
| N                                                     | -1.829319 | -1.239234 | 1.417758  |
| C                                                     | -2.234172 | -2.437124 | 2.154433  |
| H                                                     | -0.855836 | -1.003964 | 1.612606  |
| H                                                     | -3.275654 | -2.675525 | 1.922561  |
| H                                                     | -2.138938 | -2.334196 | 3.242558  |
| H                                                     | -1.614938 | -3.280005 | 1.836529  |
| H                                                     | -2.395945 | -0.434184 | 1.672872  |

---

(NA)<sub>2</sub>(SA)<sub>1</sub>(MA)<sub>1</sub>

|   |           |           |           |
|---|-----------|-----------|-----------|
| S | -0.477653 | 1.555334  | 0.550439  |
| O | 0.28103   | 2.977302  | 0.595651  |
| O | -0.29539  | 1.013954  | 1.89947   |
| H | 0.086689  | -0.692816 | 1.728593  |
| H | -0.11725  | 3.559722  | -0.066419 |
| O | -1.862348 | 1.865112  | 0.150997  |
| O | 0.212537  | 0.728941  | -0.478117 |
| O | -2.251008 | -1.252228 | 0.155041  |
| O | -3.157313 | 0.120214  | -1.291028 |
| H | -2.674209 | 0.751475  | -0.666714 |
| O | -3.255887 | -2.009488 | -1.615477 |
| N | -2.869833 | -1.125026 | -0.900459 |
| O | 2.688126  | -1.196165 | -0.23822  |
| O | 2.652079  | 0.742214  | -1.283094 |
| H | 1.711369  | 0.706266  | -0.908858 |
| O | 4.43025   | -0.471884 | -1.3031   |
| N | 3.29752   | -0.372267 | -0.922739 |
| N | 0.312197  | -1.605602 | 1.278112  |
| C | 0.787224  | -2.626202 | 2.23744   |
| H | -0.543423 | -1.882518 | 0.783512  |
| H | 1.693747  | -2.258994 | 2.716499  |
| H | 1.003692  | -3.551149 | 1.704367  |
| H | 0.015299  | -2.799069 | 2.986448  |
| H | 1.027398  | -1.384566 | 0.569529  |

(NA)<sub>2</sub>(SA)<sub>1</sub>(MA)<sub>2</sub>

|   |           |           |           |
|---|-----------|-----------|-----------|
| S | 2.229663  | -0.251122 | -0.131187 |
| O | 1.651521  | 0.316219  | 1.127584  |
| O | 3.818858  | -0.363217 | 0.138253  |
| H | 3.974077  | -1.053166 | 0.797737  |
| H | 0.378016  | -0.2965   | 1.74161   |
| O | 1.763681  | -1.6317   | -0.359123 |
| O | 2.137428  | 0.667594  | -1.258641 |
| O | -0.465332 | -0.771174 | 2.066081  |
| O | -1.038775 | 1.3397    | 2.284498  |
| H | 0.602774  | 2.324139  | 0.750877  |
| O | -2.499765 | -0.246318 | 2.564053  |
| N | -1.400127 | 0.177479  | 2.318425  |
| O | -1.361054 | 0.3276    | -0.55953  |
| O | -2.056788 | -0.75297  | -2.30325  |
| H | -1.419862 | -1.896287 | -1.182791 |
| O | -1.737797 | 1.392832  | -2.410674 |

---

|                                                       |           |           |           |
|-------------------------------------------------------|-----------|-----------|-----------|
| N                                                     | -1.727388 | 0.337436  | -1.784471 |
| N                                                     | 0.219693  | 2.456999  | -0.187508 |
| C                                                     | -0.370929 | 3.791087  | -0.411092 |
| H                                                     | 0.973805  | 2.211595  | -0.842358 |
| H                                                     | -1.137169 | 3.962241  | 0.34451   |
| H                                                     | -0.828109 | 3.797646  | -1.399687 |
| H                                                     | 0.401246  | 4.557191  | -0.341364 |
| H                                                     | -0.49993  | 1.691759  | -0.309631 |
| N                                                     | -0.900829 | -2.416235 | -0.433896 |
| C                                                     | -1.076145 | -3.879934 | -0.50905  |
| H                                                     | 0.098462  | -2.136133 | -0.505672 |
| H                                                     | -2.135286 | -4.121066 | -0.422042 |
| H                                                     | -0.520369 | -4.354875 | 0.299214  |
| H                                                     | -0.697767 | -4.231208 | -1.468448 |
| H                                                     | -1.217304 | -2.022572 | 0.456044  |
| (NA) <sub>2</sub> (SA) <sub>1</sub> (MA) <sub>3</sub> |           |           |           |
| N                                                     | -1.493394 | 1.940803  | 0.810025  |
| O                                                     | -1.92085  | 2.257073  | -0.317599 |
| O                                                     | -2.143095 | 1.174885  | 1.556065  |
| O                                                     | -0.378887 | 2.380156  | 1.195958  |
| H                                                     | 1.904597  | 1.85617   | -0.823833 |
| N                                                     | 2.98139   | -0.20625  | -0.523754 |
| O                                                     | 3.017722  | -0.051995 | -1.746195 |
| O                                                     | 2.996392  | 0.816874  | 0.239573  |
| O                                                     | 2.886379  | -1.336932 | 0.000657  |
| H                                                     | 1.643168  | -2.265543 | -0.866146 |
| S                                                     | -0.356489 | -1.827566 | -0.306348 |
| O                                                     | 0.751482  | -2.564452 | -1.175785 |
| O                                                     | -0.081393 | -2.103354 | 1.116469  |
| O                                                     | -0.25675  | -0.366354 | -0.5889   |
| O                                                     | -1.629459 | -2.384685 | -0.799136 |
| H                                                     | -2.760562 | -1.1547   | -0.645993 |
| H                                                     | 1.928357  | 0.332401  | 1.605498  |
| N                                                     | 0.97756   | 1.990898  | -1.266919 |
| C                                                     | 1.074004  | 2.530494  | -2.636344 |
| H                                                     | 0.406835  | 2.562931  | -0.630296 |
| H                                                     | 1.680484  | 1.848185  | -3.230542 |
| H                                                     | 0.072332  | 2.615749  | -3.056617 |
| H                                                     | 1.545441  | 3.512474  | -2.604994 |
| H                                                     | 0.540476  | 1.049657  | -1.245435 |
| N                                                     | 1.101122  | 0.145452  | 2.206529  |
| C                                                     | 1.471176  | -0.022562 | 3.62507   |



---

|   |           |           |           |
|---|-----------|-----------|-----------|
| H | 0.645713  | -0.716552 | 1.83152   |
| H | 1.93382   | 0.893008  | 3.993481  |
| H | 0.574296  | -0.241724 | 4.203868  |
| H | 2.174789  | -0.850318 | 3.708662  |
| H | 0.450937  | 0.934555  | 2.057325  |
| N | -3.314653 | -0.274074 | -0.496626 |
| C | -4.771858 | -0.479912 | -0.608246 |
| H | -2.963039 | 0.423349  | -1.155793 |
| H | -5.082936 | -1.200982 | 0.146772  |
| H | -5.285213 | 0.467817  | -0.446764 |
| H | -5.007137 | -0.869098 | -1.59852  |
| H | -3.034976 | 0.128027  | 0.422852  |

(NA)<sub>1</sub>(SA)<sub>2</sub>(MA)<sub>1</sub>

|   |           |           |           |
|---|-----------|-----------|-----------|
| S | -0.185159 | 2.04559   | 0.368374  |
| O | 0.692363  | 2.481302  | -0.854893 |
| O | 0.840205  | 1.802023  | 1.532536  |
| H | 1.366812  | 0.959964  | 1.371708  |
| H | 1.383279  | 1.787398  | -1.067995 |
| O | -1.04907  | 3.130594  | 0.719114  |
| O | -0.794627 | 0.734733  | 0.051579  |
| S | 2.524918  | -0.639081 | -0.429511 |
| O | 1.864758  | -1.761386 | -1.092097 |
| O | 4.057688  | -1.107273 | -0.31376  |
| H | 4.61134   | -0.333228 | -0.138096 |
| H | 0.262251  | -2.135907 | -0.256502 |
| O | 2.549903  | 0.640251  | -1.1605   |
| O | 2.033265  | -0.450323 | 0.973784  |
| O | -3.004948 | -1.436669 | 0.078781  |
| O | -3.309662 | 0.569473  | -0.774276 |
| H | -2.363529 | 0.618716  | -0.451463 |
| O | -4.922752 | -0.859056 | -0.751486 |
| N | -3.779627 | -0.648548 | -0.464795 |
| N | -0.29199  | -2.060711 | 0.614883  |
| C | -0.533489 | -3.380546 | 1.239244  |
| H | 0.297205  | -1.447334 | 1.192343  |
| H | -1.152297 | -3.978669 | 0.571978  |
| H | -1.050264 | -3.238192 | 2.187329  |
| H | 0.42437   | -3.872724 | 1.403275  |
| H | -1.170041 | -1.565418 | 0.409279  |

(NA)<sub>1</sub>(SA)<sub>2</sub>(MA)<sub>2</sub>

|   |           |           |           |
|---|-----------|-----------|-----------|
| S | -2.539468 | -1.321708 | -0.519993 |
|---|-----------|-----------|-----------|

---

|                                                       |           |           |           |
|-------------------------------------------------------|-----------|-----------|-----------|
| O                                                     | -3.472398 | -0.463943 | 0.243879  |
| O                                                     | -3.457435 | -2.319856 | -1.398905 |
| H                                                     | -4.000785 | -1.792893 | -2.000407 |
| H                                                     | -3.023614 | 1.171061  | 0.189379  |
| O                                                     | -1.75442  | -0.522904 | -1.488567 |
| O                                                     | -1.751583 | -2.252589 | 0.290928  |
| S                                                     | 0.639545  | 1.563798  | -0.133262 |
| O                                                     | 0.059915  | 1.032567  | 1.129592  |
| O                                                     | 0.744394  | 0.30308   | -1.124172 |
| H                                                     | -0.169198 | -0.016713 | -1.350558 |
| H                                                     | -0.123877 | -1.997369 | 0.834213  |
| O                                                     | -0.265247 | 2.550972  | -0.752657 |
| O                                                     | 2.033932  | 2.006549  | -0.011447 |
| O                                                     | 3.33106   | -0.87288  | 0.462632  |
| O                                                     | 4.084915  | 0.697234  | -0.870918 |
| H                                                     | 3.262495  | 1.140988  | -0.478422 |
| O                                                     | 5.044573  | -1.230582 | -0.820401 |
| N                                                     | 4.158221  | -0.543992 | -0.385576 |
| N                                                     | -2.776095 | 2.188968  | 0.207932  |
| C                                                     | -2.692964 | 2.677953  | 1.605406  |
| H                                                     | -1.843094 | 2.311464  | -0.262245 |
| H                                                     | -3.636629 | 2.484711  | 2.114918  |
| H                                                     | -2.473724 | 3.745452  | 1.600331  |
| H                                                     | -1.87733  | 2.140899  | 2.08795   |
| H                                                     | -3.477081 | 2.692928  | -0.330801 |
| N                                                     | 0.744986  | -1.618086 | 1.258401  |
| C                                                     | 1.102702  | -2.29788  | 2.520248  |
| H                                                     | 1.512258  | -1.659287 | 0.581896  |
| H                                                     | 0.280069  | -2.186226 | 3.225807  |
| H                                                     | 2.006782  | -1.842641 | 2.922948  |
| H                                                     | 1.277381  | -3.355427 | 2.325405  |
| H                                                     | 0.555246  | -0.600239 | 1.392735  |
| (NA) <sub>1</sub> (SA) <sub>2</sub> (MA) <sub>3</sub> |           |           |           |
| N                                                     | 2.212679  | 1.963693  | 0.169625  |
| O                                                     | 1.176287  | 2.682487  | 0.173533  |
| O                                                     | 2.634281  | 1.518877  | -0.929611 |
| O                                                     | 2.783087  | 1.6859    | 1.231851  |
| H                                                     | -0.010677 | 0.400148  | 1.549128  |
| S                                                     | -3.133819 | -0.152023 | 0.125672  |
| O                                                     | -4.559422 | -0.11549  | 0.334406  |
| O                                                     | -2.487982 | 1.208332  | 0.032328  |
| O                                                     | -2.914874 | -0.815825 | -1.324277 |

---

|                                                        |           |           |           |
|--------------------------------------------------------|-----------|-----------|-----------|
| O                                                      | -2.34371  | -0.978129 | 1.08334   |
| H                                                      | -1.252703 | -2.183162 | 0.757466  |
| H                                                      | -1.974095 | -1.094395 | -1.41783  |
| S                                                      | 0.540515  | -1.782892 | -0.291446 |
| O                                                      | -0.22138  | -1.220322 | -1.443347 |
| O                                                      | -0.456098 | -2.727634 | 0.49244   |
| O                                                      | 0.962715  | -0.697378 | 0.638335  |
| O                                                      | 1.673893  | -2.625143 | -0.6849   |
| H                                                      | 3.168886  | -1.646733 | -0.327155 |
| H                                                      | -0.140163 | 0.551777  | -1.764672 |
| N                                                      | -0.462777 | 1.536018  | -1.791577 |
| C                                                      | -0.649139 | 2.014359  | -3.175838 |
| H                                                      | -1.347592 | 1.533158  | -1.239834 |
| H                                                      | 0.309084  | 1.989269  | -3.69378  |
| H                                                      | -1.031748 | 3.034396  | -3.155184 |
| H                                                      | -1.363633 | 1.365808  | -3.682195 |
| H                                                      | 0.224784  | 2.099069  | -1.256781 |
| N                                                      | 3.683717  | -0.838003 | 0.071455  |
| C                                                      | 5.142728  | -1.029676 | 0.179269  |
| H                                                      | 3.431774  | 0.012287  | -0.480562 |
| H                                                      | 5.351371  | -1.900337 | 0.800436  |
| H                                                      | 5.582116  | -0.137989 | 0.625578  |
| H                                                      | 5.556639  | -1.183853 | -0.816684 |
| H                                                      | 3.238088  | -0.654008 | 0.974085  |
| N                                                      | -0.501736 | 1.229359  | 1.940729  |
| C                                                      | -0.91247  | 1.009802  | 3.342346  |
| H                                                      | 0.13475   | 2.022462  | 1.802468  |
| H                                                      | -1.595721 | 0.16104   | 3.36117   |
| H                                                      | -1.416788 | 1.900244  | 3.716918  |
| H                                                      | -0.030529 | 0.799955  | 3.947128  |
| H                                                      | -1.325248 | 1.359727  | 1.313597  |
| (NA) <sub>1</sub> (SA) <sub>1</sub> (DMA) <sub>1</sub> |           |           |           |
| S                                                      | -1.845105 | -0.620669 | -0.070256 |
| O                                                      | -0.53684  | -1.01474  | -0.608455 |
| O                                                      | -2.919718 | -1.565383 | -0.076857 |
| O                                                      | -2.324134 | 0.66731   | -0.850569 |
| O                                                      | -1.627497 | -0.106675 | 1.403533  |
| H                                                      | -1.633752 | 1.375636  | -0.785876 |
| H                                                      | -0.826638 | 0.502304  | 1.423456  |
| N                                                      | 0.742887  | 1.852948  | 0.077844  |
| O                                                      | 0.606172  | 1.220813  | 1.169794  |
| H                                                      | 1.135511  | -0.932547 | -0.158256 |

---

|   |           |           |           |
|---|-----------|-----------|-----------|
| O | 1.874859  | 1.899558  | -0.440306 |
| O | -0.237519 | 2.383867  | -0.468115 |
| N | 2.167908  | -0.830952 | -0.086102 |
| H | 2.320787  | 0.19877   | -0.132188 |
| C | 2.792461  | -1.482449 | -1.258592 |
| H | 2.56706   | -2.549205 | -1.237797 |
| H | 2.378693  | -1.036167 | -2.162396 |
| H | 3.871389  | -1.326344 | -1.225128 |
| C | 2.619785  | -1.342866 | 1.226501  |
| H | 2.106101  | -0.776884 | 2.002705  |
| H | 2.373167  | -2.402542 | 1.302547  |
| H | 3.697754  | -1.202415 | 1.315175  |

(NA)<sub>1</sub>(SA)<sub>1</sub>(DMA)<sub>2</sub>

|   |           |           |           |
|---|-----------|-----------|-----------|
| S | -0.014576 | 1.832225  | -0.179359 |
| O | -1.469363 | 1.92957   | -0.436506 |
| O | 0.707566  | 3.066938  | 0.035314  |
| O | 0.649241  | 1.212323  | -1.527191 |
| O | 0.225238  | 0.779576  | 0.867191  |
| H | 0.128084  | 0.432222  | -1.818004 |
| H | 1.579227  | -0.064555 | 0.745712  |
| N | -0.000543 | -1.887478 | -0.957871 |
| O | -0.756402 | -1.202608 | -1.685787 |
| H | -2.13777  | 0.475611  | 0.106204  |
| O | -0.405793 | -2.274957 | 0.16506   |
| O | 1.16252   | -2.15188  | -1.329808 |
| N | 2.461923  | -0.623912 | 0.566119  |
| H | 2.179294  | -1.319665 | -0.151215 |
| C | 2.863552  | -1.321061 | 1.802856  |
| H | 3.042372  | -0.58268  | 2.58593   |
| H | 2.055047  | -1.990195 | 2.097425  |
| H | 3.772906  | -1.896286 | 1.620681  |
| C | 3.474607  | 0.29906   | 0.006987  |
| H | 3.054816  | 0.756413  | -0.889126 |
| H | 3.688566  | 1.075335  | 0.742881  |
| H | 4.383353  | -0.255262 | -0.233388 |
| N | -2.491752 | -0.401241 | 0.5611    |
| H | -1.721456 | -1.094432 | 0.461163  |
| C | -3.673785 | -0.892966 | -0.172751 |
| H | -4.451809 | -0.128451 | -0.154358 |
| H | -3.370768 | -1.097206 | -1.199313 |
| H | -4.038715 | -1.808346 | 0.296226  |
| C | -2.717706 | -0.114763 | 1.991638  |

---

|   |           |           |          |
|---|-----------|-----------|----------|
| H | -1.784942 | 0.270349  | 2.403745 |
| H | -3.501639 | 0.638049  | 2.086986 |
| H | -3.014812 | -1.031396 | 2.504189 |

(NA)<sub>2</sub>(SA)<sub>1</sub>(DMA)<sub>1</sub>

|   |           |           |           |
|---|-----------|-----------|-----------|
| N | -2.739257 | 0.671563  | -0.096972 |
| O | -2.200523 | 0.682871  | 1.063998  |
| H | 0.118529  | 1.199834  | 0.00315   |
| O | -2.735266 | 1.725142  | -0.750214 |
| O | -3.223614 | -0.377434 | -0.541263 |
| N | 3.034552  | -0.004803 | 0.043739  |
| O | 3.159489  | -1.285887 | -0.354024 |
| H | 2.363422  | -1.773581 | -0.013047 |
| O | 2.16894   | 0.250939  | 0.866678  |
| O | 3.807122  | 0.770307  | -0.461227 |
| N | -0.02705  | 2.219685  | -0.059488 |
| H | -1.035763 | 2.308457  | -0.29069  |
| C | 0.805306  | 2.72754   | -1.174509 |
| H | 1.85662   | 2.561181  | -0.934873 |
| H | 0.539323  | 2.180802  | -2.078983 |
| H | 0.613188  | 3.792292  | -1.310474 |
| C | 0.245936  | 2.850715  | 1.252306  |
| H | -0.44093  | 2.423066  | 1.981472  |
| H | 1.278729  | 2.64177   | 1.530139  |
| H | 0.081122  | 3.925416  | 1.166943  |
| S | -0.304789 | -1.734221 | 0.003759  |
| O | -0.112776 | -0.497973 | -0.750442 |
| O | 0.830282  | -2.623829 | 0.143839  |
| O | -1.455895 | -2.565508 | -0.685476 |
| O | -0.855203 | -1.405508 | 1.419749  |
| H | -2.239689 | -1.97305  | -0.76627  |
| H | -1.503546 | -0.59826  | 1.361823  |

(NA)<sub>2</sub>(SA)<sub>1</sub>(DMA)<sub>2</sub>

|   |           |           |           |
|---|-----------|-----------|-----------|
| S | -0.363647 | -2.382178 | -0.530081 |
| O | -1.234401 | -2.602402 | 0.769825  |
| O | -0.589324 | -3.523704 | -1.371858 |
| O | 0.990249  | -1.996655 | -0.158475 |
| O | -1.057962 | -1.095525 | -1.154029 |
| H | 2.306459  | -0.128833 | 1.10043   |
| H | -0.357785 | -0.390416 | -1.380395 |
| N | 0.428735  | 1.898953  | -1.614078 |
| O | 0.760953  | 0.657268  | -1.558959 |

---

|   |           |           |           |
|---|-----------|-----------|-----------|
| H | -2.037594 | 0.602427  | 0.860689  |
| O | -0.783388 | 2.181964  | -1.709764 |
| O | 1.303898  | 2.749039  | -1.573354 |
| N | 0.069416  | 0.267225  | 1.984575  |
| O | -1.087579 | -0.275012 | 2.037627  |
| H | -1.108294 | -1.839749 | 1.397105  |
| O | 1.042457  | -0.333026 | 2.457307  |
| O | 0.181736  | 1.376392  | 1.438295  |
| N | -2.544907 | 1.215471  | 0.186065  |
| H | -1.862912 | 1.426861  | -0.570968 |
| C | -2.865464 | 2.487214  | 0.870701  |
| H | -3.568558 | 2.290395  | 1.681357  |
| H | -1.937973 | 2.896594  | 1.269506  |
| H | -3.302653 | 3.181159  | 0.151842  |
| C | -3.71351  | 0.50356   | -0.374893 |
| H | -3.358286 | -0.404032 | -0.861039 |
| H | -4.402196 | 0.253578  | 0.433546  |
| H | -4.210771 | 1.14927   | -1.100036 |
| N | 2.8035    | 0.261411  | 0.281238  |
| H | 2.063367  | 0.39913   | -0.441635 |
| C | 3.799639  | -0.707258 | -0.227844 |
| H | 4.559553  | -0.874668 | 0.537011  |
| H | 3.283378  | -1.637275 | -0.460545 |
| H | 4.260762  | -0.294784 | -1.126094 |
| C | 3.364434  | 1.581882  | 0.649726  |
| H | 2.552844  | 2.194397  | 1.039156  |
| H | 4.135049  | 1.441807  | 1.409449  |
| H | 3.783037  | 2.048466  | -0.24174  |

(NA)<sub>2</sub>(SA)<sub>1</sub>(DMA)<sub>3</sub>

|   |           |           |           |
|---|-----------|-----------|-----------|
| S | -0.599047 | -0.574069 | -1.639981 |
| O | -1.134155 | -1.932835 | -1.508865 |
| O | 0.151198  | -0.129627 | -0.433    |
| O | -1.641976 | 0.420905  | -2.005347 |
| O | 0.452298  | -0.547135 | -2.833817 |
| H | -2.795058 | 0.009476  | 0.863716  |
| H | 1.365987  | -0.400536 | -2.463789 |
| N | 2.963802  | -0.549809 | -0.609559 |
| O | 2.73351   | 0.202513  | -1.618795 |
| H | 1.062544  | 1.753839  | 0.638993  |
| O | 3.281631  | -0.012523 | 0.467402  |
| O | 2.829873  | -1.772644 | -0.714081 |
| N | -0.899554 | 0.952165  | 1.928674  |

---

|                                                        |           |           |           |
|--------------------------------------------------------|-----------|-----------|-----------|
| O                                                      | -1.538747 | -0.125596 | 2.146499  |
| H                                                      | 0.8795    | -1.219035 | 0.805126  |
| O                                                      | 0.309328  | 1.011129  | 2.22971   |
| O                                                      | -1.478696 | 1.911219  | 1.402947  |
| N                                                      | -3.426195 | 0.097547  | 0.03935   |
| H                                                      | -2.791445 | 0.336903  | -0.76451  |
| C                                                      | -4.381086 | 1.199287  | 0.275614  |
| H                                                      | -5.048256 | 0.928241  | 1.095637  |
| H                                                      | -3.812804 | 2.089488  | 0.541138  |
| H                                                      | -4.9595   | 1.369494  | -0.633626 |
| C                                                      | -4.057139 | -1.211108 | -0.244199 |
| H                                                      | -3.269003 | -1.918529 | -0.505174 |
| H                                                      | -4.609532 | -1.54273  | 0.636757  |
| H                                                      | -4.736213 | -1.101569 | -1.091006 |
| N                                                      | 0.717397  | -1.862998 | 1.600941  |
| H                                                      | -0.129938 | -1.45468  | 2.028843  |
| C                                                      | 1.846315  | -1.826911 | 2.555887  |
| H                                                      | 2.756982  | -2.089012 | 2.018744  |
| H                                                      | 1.929759  | -0.814232 | 2.945546  |
| H                                                      | 1.646317  | -2.535504 | 3.361997  |
| C                                                      | 0.437711  | -3.204981 | 1.03989   |
| H                                                      | -0.340979 | -3.104906 | 0.282551  |
| H                                                      | 1.349811  | -3.569154 | 0.566918  |
| H                                                      | 0.128957  | -3.873762 | 1.845325  |
| N                                                      | 1.530958  | 2.278366  | -0.11844  |
| H                                                      | 1.971402  | 1.551681  | -0.72323  |
| C                                                      | 2.591105  | 3.119911  | 0.472887  |
| H                                                      | 2.140293  | 3.821034  | 1.17668   |
| H                                                      | 3.295538  | 2.462861  | 0.98101   |
| H                                                      | 3.100334  | 3.662968  | -0.32479  |
| C                                                      | 0.51543   | 3.025763  | -0.893912 |
| H                                                      | -0.222077 | 2.318943  | -1.274283 |
| H                                                      | 0.027405  | 3.743545  | -0.23414  |
| H                                                      | 1.011727  | 3.538354  | -1.71973  |
| (NA) <sub>1</sub> (SA) <sub>2</sub> (DMA) <sub>1</sub> |           |           |           |
| S                                                      | -2.705907 | 0.274439  | -0.393567 |
| O                                                      | -1.551619 | 1.054142  | 0.058085  |
| O                                                      | -3.902399 | 0.951323  | -0.793183 |
| O                                                      | -3.086747 | -0.747969 | 0.743995  |
| O                                                      | -2.231346 | -0.637615 | -1.593478 |
| H                                                      | -2.284299 | -1.261743 | 1.028087  |
| H                                                      | -1.326576 | -1.008476 | -1.410218 |

---

|   |           |           |           |
|---|-----------|-----------|-----------|
| S | 0.42923   | -1.677461 | 0.572199  |
| O | 1.162249  | -0.553797 | 1.16246   |
| O | -0.809321 | -2.077254 | 1.232409  |
| O | 1.362899  | -2.974258 | 0.687349  |
| O | 0.232804  | -1.458866 | -0.911424 |
| H | 2.233589  | -2.76077  | 0.315589  |
| H | 1.211567  | -0.381056 | -1.467969 |
| N | 2.942588  | 0.225778  | -0.946116 |
| O | 1.76626   | 0.470284  | -1.562235 |
| H | 0.239603  | 1.412809  | 0.41082   |
| O | 3.466969  | 1.206989  | -0.453158 |
| O | 3.362762  | -0.907982 | -0.942752 |
| N | 0.838925  | 2.203311  | 0.69219   |
| H | 1.803748  | 1.918804  | 0.487771  |
| C | 0.660858  | 2.399199  | 2.150993  |
| H | -0.386319 | 2.637594  | 2.33699   |
| H | 0.923127  | 1.466726  | 2.648908  |
| H | 1.304122  | 3.21393   | 2.485086  |
| C | 0.483518  | 3.377517  | -0.138612 |
| H | 0.673842  | 3.128879  | -1.181952 |
| H | -0.575922 | 3.588571  | 0.002617  |
| H | 1.093396  | 4.229188  | 0.164808  |

(NA)<sub>1</sub>(SA)<sub>2</sub>(DMA)<sub>2</sub>

|   |           |           |           |
|---|-----------|-----------|-----------|
| S | 0.856683  | 2.508037  | -0.434047 |
| O | -0.582241 | 2.655416  | -0.286247 |
| O | 1.706787  | 3.650585  | -0.606882 |
| O | 1.171587  | 1.51912   | -1.628769 |
| O | 1.378625  | 1.659626  | 0.819126  |
| H | 0.615769  | 0.690849  | -1.508446 |
| H | 1.772853  | -1.731324 | 0.46339   |
| S | -0.576787 | -1.88801  | -1.139702 |
| O | -0.151109 | -0.489323 | -0.787802 |
| O | 0.097586  | -2.418938 | -2.306486 |
| O | -2.039625 | -1.999195 | -1.06113  |
| O | 0.029895  | -2.762832 | 0.100189  |
| H | -2.565286 | -0.471395 | -0.183777 |
| H | -0.498346 | -2.553659 | 0.903694  |
| N | -0.43759  | -0.490653 | 2.183182  |
| O | -0.684758 | 0.749663  | 2.064936  |
| H | 0.592971  | 1.381498  | 1.404308  |
| O | 0.719496  | -0.864273 | 2.416166  |
| O | -1.363332 | -1.309191 | 2.027807  |



---

|   |           |           |           |
|---|-----------|-----------|-----------|
| N | 2.521727  | -1.042933 | 0.29012   |
| H | 2.048621  | -0.129111 | 0.367789  |
| C | 3.058984  | -1.22281  | -1.082977 |
| H | 3.598851  | -2.169212 | -1.123488 |
| H | 2.230411  | -1.250084 | -1.789248 |
| H | 3.727525  | -0.39213  | -1.308995 |
| C | 3.551241  | -1.12824  | 1.353992  |
| H | 3.066047  | -0.964524 | 2.314171  |
| H | 4.011958  | -2.115854 | 1.321345  |
| H | 4.302401  | -0.358785 | 1.173396  |
| N | -2.754131 | 0.529891  | 0.014096  |
| H | -1.874184 | 0.901103  | 0.403538  |
| C | -3.815469 | 0.654664  | 1.03647   |
| H | -4.732847 | 0.207814  | 0.651249  |
| H | -3.482436 | 0.130088  | 1.930657  |
| H | -3.9741   | 1.711229  | 1.254458  |
| C | -3.052027 | 1.200308  | -1.27109  |
| H | -2.209861 | 1.040774  | -1.941896 |
| H | -3.956781 | 0.761591  | -1.693316 |
| H | -3.18161  | 2.267772  | -1.096258 |

(NA)<sub>1</sub>(SA)<sub>2</sub>(DMA)<sub>3</sub>

|   |           |           |           |
|---|-----------|-----------|-----------|
| S | -0.474514 | -1.736933 | -1.059669 |
| O | -1.599582 | -1.756957 | -2.011874 |
| O | 0.476362  | -2.929292 | -1.510533 |
| O | -0.902962 | -1.975568 | 0.330408  |
| O | 0.341969  | -0.490727 | -1.172363 |
| H | -2.699941 | 0.074015  | 0.256927  |
| H | -0.613102 | 0.851197  | -1.260008 |
| S | -1.002982 | 2.137171  | 0.403226  |
| O | -1.583004 | 0.988999  | 1.178269  |
| O | -1.756637 | 3.368994  | 0.506059  |
| O | -1.149255 | 1.684275  | -1.143989 |
| O | 0.456062  | 2.234553  | 0.654988  |
| H | -0.259658 | -0.278389 | 1.786359  |
| H | 1.649105  | 1.527632  | -0.47102  |
| N | 2.91306   | -1.309099 | 0.126156  |
| O | 2.385838  | -2.410843 | 0.37993   |
| H | 1.289004  | -2.899283 | -0.947654 |
| O | 3.425125  | -1.082337 | -0.985941 |
| O | 2.903995  | -0.398796 | 1.000464  |
| N | 2.443696  | 1.542311  | -1.140107 |
| H | 2.831718  | 0.578389  | -1.173442 |

---

|                                                      |           |           |           |
|------------------------------------------------------|-----------|-----------|-----------|
| C                                                    | 3.464944  | 2.453517  | -0.582248 |
| H                                                    | 3.016884  | 3.436861  | -0.435512 |
| H                                                    | 3.794091  | 2.041458  | 0.371038  |
| H                                                    | 4.307071  | 2.515952  | -1.273082 |
| C                                                    | 1.93934   | 1.929929  | -2.474945 |
| H                                                    | 1.250162  | 1.157917  | -2.814426 |
| H                                                    | 1.419937  | 2.885413  | -2.393821 |
| H                                                    | 2.78028   | 2.010577  | -3.165492 |
| N                                                    | 0.528879  | -0.500293 | 2.419703  |
| H                                                    | 1.388275  | -0.521719 | 1.829333  |
| C                                                    | 0.344066  | -1.833999 | 3.032262  |
| H                                                    | -0.557709 | -1.819926 | 3.647125  |
| H                                                    | 0.245617  | -2.563808 | 2.232233  |
| H                                                    | 1.21552   | -2.058647 | 3.648785  |
| C                                                    | 0.67258   | 0.59502   | 3.404211  |
| H                                                    | 0.826919  | 1.525666  | 2.859682  |
| H                                                    | -0.240543 | 0.661527  | 3.996955  |
| H                                                    | 1.526482  | 0.378545  | 4.048115  |
| N                                                    | -3.404526 | -0.395626 | -0.360115 |
| H                                                    | -2.849467 | -0.865109 | -1.106941 |
| C                                                    | -4.281025 | 0.643972  | -0.941446 |
| H                                                    | -4.798058 | 1.164144  | -0.133907 |
| H                                                    | -3.654664 | 1.34965   | -1.486782 |
| H                                                    | -5.003001 | 0.175264  | -1.611874 |
| C                                                    | -4.103607 | -1.437181 | 0.421876  |
| H                                                    | -3.353614 | -2.147092 | 0.770708  |
| H                                                    | -4.611383 | -0.968765 | 1.266486  |
| H                                                    | -4.828841 | -1.942279 | -0.217766 |
| (NA) <sub>1</sub> (SA) <sub>1</sub> (A) <sub>1</sub> |           |           |           |
| N                                                    | -2.910015 | 0.359662  | -0.025069 |
| O                                                    | -2.548211 | -0.622442 | -0.867441 |
| H                                                    | -1.584173 | -0.831481 | -0.697948 |
| O                                                    | -2.063273 | 0.788678  | 0.757184  |
| O                                                    | -4.043922 | 0.734669  | -0.118797 |
| S                                                    | 1.067781  | -0.569887 | 0.096954  |
| O                                                    | 2.293337  | -1.253166 | 0.428598  |
| O                                                    | -0.032815 | -1.310853 | -0.511914 |
| O                                                    | 1.352098  | 0.657711  | -0.814341 |
| O                                                    | 0.531216  | 0.065536  | 1.453145  |
| H                                                    | -0.396078 | 0.358429  | 1.316223  |
| H                                                    | 2.344891  | 1.005908  | -0.665765 |
| N                                                    | 3.796676  | 1.34593   | -0.416246 |

---

|   |          |          |           |
|---|----------|----------|-----------|
| H | 4.193186 | 0.488262 | -0.037563 |
| H | 3.932085 | 2.084439 | 0.26754   |
| H | 4.311531 | 1.592428 | -1.256015 |

(NA)<sub>1</sub>(SA)<sub>1</sub>(A)<sub>2</sub>

|   |           |           |           |
|---|-----------|-----------|-----------|
| N | 2.632962  | -0.040759 | -0.122286 |
| O | 2.851036  | -1.209963 | -0.512575 |
| H | 1.476577  | -2.069208 | 0.086188  |
| O | 1.911867  | 0.116474  | 0.920869  |
| O | 3.069068  | 0.941641  | -0.720456 |
| S | -1.801481 | 0.009084  | -0.120856 |
| O | -1.480549 | -1.120884 | -1.01903  |
| O | -1.234768 | -0.126023 | 1.224072  |
| O | -3.403609 | -0.053188 | 0.124863  |
| O | -1.546858 | 1.329121  | -0.744548 |
| H | -0.220163 | 2.084173  | -0.074205 |
| H | -3.846711 | 0.045136  | -0.729164 |
| N | 0.657774  | 2.403324  | 0.411532  |
| H | 0.42059   | 3.007004  | 1.193536  |
| H | 1.27448   | 2.885217  | -0.239429 |
| H | 1.174082  | 1.533145  | 0.746886  |
| N | 0.517282  | -2.309252 | 0.439081  |
| H | -0.200465 | -2.096466 | -0.28756  |
| H | 0.305606  | -1.652439 | 1.19991   |
| H | 0.454095  | -3.272529 | 0.753696  |

(NA)<sub>2</sub>(SA)<sub>1</sub>(A)<sub>1</sub>

|   |           |           |           |
|---|-----------|-----------|-----------|
| S | -2.002215 | -0.216458 | -0.18978  |
| O | -1.713148 | 0.957981  | -1.032882 |
| O | -1.024735 | -1.3163   | -0.387992 |
| O | -3.42582  | -0.765516 | -0.694375 |
| O | -2.232638 | 0.057922  | 1.235778  |
| H | -0.9198   | -0.486091 | 2.096269  |
| H | -3.441958 | -0.746733 | -1.661809 |
| N | 1.139256  | 2.183935  | 0.156216  |
| O | 0.840176  | 1.15794   | 0.767176  |
| O | 2.088565  | 2.888015  | 0.3635    |
| O | 0.330667  | 2.556025  | -0.840641 |
| H | -0.432369 | 1.895513  | -0.869925 |
| N | 2.247426  | -1.541719 | -0.494634 |
| O | 1.833508  | -1.945552 | 0.593358  |
| O | 3.39177   | -1.518322 | -0.851294 |
| O | 1.347394  | -1.090861 | -1.376934 |

---

|   |           |           |           |
|---|-----------|-----------|-----------|
| H | 0.429522  | -1.175035 | -0.959642 |
| N | 0.025285  | -0.809113 | 2.436098  |
| H | -0.048787 | -1.384262 | 3.270718  |
| H | 0.604681  | 0.014569  | 2.604529  |
| H | 0.474479  | -1.337023 | 1.66702   |

(NA)<sub>2</sub>(SA)<sub>1</sub>(A)<sub>2</sub>

|   |           |           |           |
|---|-----------|-----------|-----------|
| S | -1.866122 | -0.358571 | 0.08024   |
| O | -2.076213 | -0.066219 | 1.513665  |
| O | -0.457842 | -0.156832 | -0.319907 |
| O | -2.740323 | 0.700706  | -0.758846 |
| O | -2.394949 | -1.665437 | -0.353662 |
| H | -1.039689 | -2.546096 | -0.856184 |
| H | -2.273271 | 1.553504  | -0.76256  |
| N | 0.518177  | 2.414999  | -0.460584 |
| O | 0.67566   | 2.441827  | 0.7521    |
| O | -0.429306 | 2.856193  | -1.065636 |
| O | 1.488821  | 1.881575  | -1.209287 |
| H | 2.033072  | 1.293515  | -0.600528 |
| N | 2.241278  | -1.024061 | -0.013835 |
| O | 2.575168  | 0.109907  | 0.413588  |
| O | 2.365171  | -1.326924 | -1.19847  |
| O | 1.748574  | -1.854129 | 0.813847  |
| H | 0.976382  | -0.725887 | 2.030982  |
| N | -0.062354 | -2.852675 | -1.09954  |
| H | -0.028639 | -3.804876 | -1.45221  |
| H | 0.557848  | -2.734257 | -0.272169 |
| H | 0.31839   | -2.200524 | -1.788786 |
| N | 0.488424  | 0.093348  | 2.444827  |
| H | 0.687233  | 0.180817  | 3.436879  |
| H | -0.540907 | 0.01926   | 2.254662  |
| H | 0.830772  | 0.915055  | 1.930845  |

(NA)<sub>2</sub>(SA)<sub>1</sub>(A)<sub>3</sub>

|   |           |           |           |
|---|-----------|-----------|-----------|
| S | 0.058576  | 1.828903  | -0.062453 |
| O | -0.931369 | 2.689444  | -0.739802 |
| O | 0.08402   | 1.980476  | 1.404932  |
| O | 1.460566  | 2.299452  | -0.643748 |
| O | -0.115742 | 0.396824  | -0.431303 |
| H | 2.156916  | 1.699579  | -0.275031 |
| H | 0.998022  | -1.098053 | 1.731458  |
| N | -1.987863 | -1.702784 | 0.181418  |
| O | -2.359269 | -1.065249 | 1.193014  |

---

|   |           |           |           |
|---|-----------|-----------|-----------|
| H | -2.941176 | 0.206573  | -0.821197 |
| O | -2.470046 | -1.423302 | -0.948935 |
| O | -1.125065 | -2.592932 | 0.284656  |
| N | 2.637292  | -0.767306 | -0.012117 |
| O | 2.943015  | -0.870349 | -1.216491 |
| H | 1.468371  | -1.805026 | -1.80133  |
| O | 2.089079  | -1.740541 | 0.570178  |
| O | 2.836047  | 0.295664  | 0.61358   |
| N | 0.43547   | -1.783991 | -1.901865 |
| H | 0.149946  | -0.816949 | -1.645411 |
| H | -0.020716 | -2.39111  | -1.198149 |
| H | 0.131885  | -2.025566 | -2.839743 |
| N | -3.174685 | 1.182373  | -0.501586 |
| H | -4.022234 | 1.525593  | -0.944652 |
| H | -2.359127 | 1.831154  | -0.680033 |
| H | -3.310626 | 1.101901  | 0.506292  |
| N | 0.286287  | -0.624888 | 2.339242  |
| H | 0.306522  | 0.395953  | 2.124597  |
| H | 0.49494   | -0.793148 | 3.318691  |
| H | -0.655346 | -0.973085 | 2.099471  |

(NA)<sub>1</sub>(SA)<sub>2</sub>(A)<sub>1</sub>

|   |           |           |           |
|---|-----------|-----------|-----------|
| S | 0.542869  | 1.571866  | 0.243973  |
| O | -0.714878 | 2.081948  | 0.774321  |
| O | 0.373703  | 0.855082  | -1.066108 |
| O | 1.367773  | 0.773237  | 1.171582  |
| O | 1.389276  | 2.88888   | -0.08462  |
| H | 2.277257  | 2.631058  | -0.375598 |
| H | 1.039199  | -0.795923 | 1.702578  |
| S | -2.633193 | -0.62008  | -0.178759 |
| O | -1.506963 | -1.218015 | 0.540845  |
| O | -3.824763 | -1.377921 | -0.404133 |
| O | -2.093432 | -0.119447 | -1.577052 |
| O | -3.037241 | 0.706209  | 0.574165  |
| H | -2.235492 | 1.265295  | 0.738131  |
| H | -1.193171 | 0.286065  | -1.476288 |
| N | 2.929703  | -1.127278 | -0.561902 |
| O | 3.470039  | -0.143537 | -1.0041   |
| O | 3.39133   | -1.952669 | 0.203574  |
| O | 1.65308   | -1.383361 | -0.939329 |
| H | 1.237769  | -0.494776 | -1.177112 |
| N | 0.829566  | -1.819091 | 1.794709  |
| H | -0.068671 | -1.950968 | 1.301852  |

---

|                                                      |           |           |           |
|------------------------------------------------------|-----------|-----------|-----------|
| H                                                    | 0.748326  | -2.091066 | 2.77101   |
| H                                                    | 1.581689  | -2.336928 | 1.329171  |
| (NA) <sub>1</sub> (SA) <sub>2</sub> (A) <sub>2</sub> |           |           |           |
| S                                                    | -2.195562 | -0.21369  | -0.075895 |
| O                                                    | -1.822227 | -0.470577 | -1.47557  |
| O                                                    | -1.726423 | -1.21787  | 0.899595  |
| O                                                    | -3.79588  | -0.391013 | 0.007392  |
| O                                                    | -1.920848 | 1.179334  | 0.35384   |
| H                                                    | -4.208692 | 0.191912  | -0.645058 |
| H                                                    | -0.720758 | 1.954715  | -0.267968 |
| S                                                    | 1.608771  | -1.422356 | 0.060042  |
| O                                                    | 0.898457  | -0.118343 | 0.031501  |
| O                                                    | 2.529073  | -1.574761 | -1.073392 |
| O                                                    | 0.471636  | -2.529233 | -0.254662 |
| O                                                    | 2.135762  | -1.705358 | 1.40661   |
| H                                                    | -0.362113 | -2.261866 | 0.185809  |
| H                                                    | 1.031401  | -0.679617 | 2.424598  |
| N                                                    | 1.033028  | 2.641922  | 0.101258  |
| O                                                    | 0.037012  | 2.402187  | -0.778723 |
| O                                                    | 0.769282  | 2.544431  | 1.290018  |
| O                                                    | 2.083535  | 2.957786  | -0.389281 |
| H                                                    | 0.867462  | 0.903496  | -2.196533 |
| N                                                    | 0.708602  | -0.015306 | -2.621843 |
| H                                                    | 0.674119  | 0.046677  | -3.635676 |
| H                                                    | -0.199956 | -0.342831 | -2.230097 |
| H                                                    | 1.470987  | -0.649049 | -2.295865 |
| N                                                    | 0.217324  | -0.059008 | 2.634691  |
| H                                                    | 0.068572  | 0.056052  | 3.633095  |
| H                                                    | -0.612534 | -0.47383  | 2.169485  |
| H                                                    | 0.392458  | 0.845176  | 2.17448   |
| (NA) <sub>1</sub> (SA) <sub>2</sub> (A) <sub>3</sub> |           |           |           |
| S                                                    | -0.808004 | 1.86623   | -0.056068 |
| O                                                    | -0.773764 | 0.418188  | -0.409444 |
| O                                                    | -2.002202 | 2.525012  | -0.622555 |
| O                                                    | 0.417767  | 2.558872  | -0.778216 |
| O                                                    | -0.658217 | 2.042958  | 1.401362  |
| H                                                    | 1.253416  | 2.119513  | -0.462305 |
| H                                                    | -0.306761 | 0.517338  | 2.136755  |
| S                                                    | 2.803764  | -0.23268  | -0.056086 |
| O                                                    | 2.794471  | -0.601712 | -1.485784 |
| O                                                    | 2.516164  | 1.194399  | 0.182222  |

---

|   |           |           |           |
|---|-----------|-----------|-----------|
| O | 4.317527  | -0.458218 | 0.473504  |
| O | 2.027719  | -1.166865 | 0.775996  |
| H | 4.882505  | 0.213628  | 0.067589  |
| H | 0.013001  | -2.306861 | -1.102145 |
| N | -2.14061  | -2.05324  | 0.160243  |
| O | -2.635138 | -1.999972 | -0.978645 |
| O | -1.101798 | -2.701392 | 0.38483   |
| O | -2.677674 | -1.412864 | 1.116935  |
| H | -3.772272 | -0.030633 | -1.278174 |
| N | -3.843488 | 0.54837   | -0.440411 |
| H | -3.49899  | -0.081159 | 0.323148  |
| H | -4.805417 | 0.83332   | -0.280292 |
| H | -3.203093 | 1.385869  | -0.532732 |
| N | 0.275316  | -1.623052 | -1.830479 |
| H | -0.075934 | -1.926095 | -2.733407 |
| H | 1.302342  | -1.448265 | -1.839127 |
| H | -0.171896 | -0.729741 | -1.53662  |
| N | -0.154189 | -0.499242 | 2.32236   |
| H | 0.047125  | -0.670649 | 3.302828  |
| H | 0.651229  | -0.805383 | 1.733798  |
| H | -1.005447 | -1.004773 | 2.031509  |

**Table S5.** Single point energies (kcal mol<sup>-1</sup>) at the DLPNO-CCSD(T)/aug-cc-pVTZ level and the corresponding Gibbs free energy correction  $G_{\text{corr}}$  (kcal mol<sup>-1</sup>) and Gibbs free energy  $G$  (kcal mol<sup>-1</sup>) at 298.15K for all the most stable configurations of the NA-SA-MA, NA-SA-DMA and NA-SA-A systems.

| clusters                                              | single point | $G_{\text{corr}}$ | $G$          |
|-------------------------------------------------------|--------------|-------------------|--------------|
| (NA) <sub>1</sub> (SA) <sub>1</sub> (MA) <sub>1</sub> | -1075.773484 | 0.091878          | -1075.681606 |
| (NA) <sub>1</sub> (SA) <sub>1</sub> (MA) <sub>2</sub> | -1171.525076 | 0.157342          | -1171.367734 |
| (NA) <sub>1</sub> (SA) <sub>1</sub> (MA) <sub>3</sub> | -1267.254704 | 0.21914           | -1267.035564 |
| (NA) <sub>1</sub> (SA) <sub>2</sub> (MA) <sub>1</sub> | -1775.280179 | 0.127282          | -1775.152897 |
| (NA) <sub>2</sub> (SA) <sub>1</sub> (MA) <sub>1</sub> | -1356.344711 | 0.114497          | -1356.230214 |
| (NA) <sub>2</sub> (SA) <sub>1</sub> (MA) <sub>2</sub> | -1452.095375 | 0.180389          | -1451.914986 |
| (NA) <sub>1</sub> (SA) <sub>2</sub> (MA) <sub>2</sub> | -1871.036314 | 0.192662          | -1870.843652 |
| (NA) <sub>1</sub> (SA) <sub>2</sub> (MA) <sub>3</sub> | -1966.794457 | 0.261848          | -1966.532609 |
| (NA) <sub>2</sub> (SA) <sub>1</sub> (MA) <sub>3</sub> | -1547.85172  | 0.248328          | -1547.603392 |
| (NA) <sub>1</sub> (MA) <sub>1</sub>                   | -376.2721918 | 0.061153          | -376.2110388 |
| (NA) <sub>1</sub> (MA) <sub>2</sub>                   | -471.9934427 | 0.120294          | -471.8731487 |
| (NA) <sub>1</sub> (MA) <sub>3</sub>                   | -567.7236542 | 0.184261          | -567.5393932 |
| (NA) <sub>2</sub> (MA) <sub>1</sub>                   | -656.8366666 | 0.082008          | -656.7546586 |
| (NA) <sub>2</sub> (MA) <sub>2</sub>                   | -752.5852841 | 0.148447          | -752.4368371 |
| (NA) <sub>2</sub> (MA) <sub>3</sub>                   | -848.3150413 | 0.208378          | -848.1066633 |
| (NA) <sub>3</sub> (MA) <sub>1</sub>                   | -937.4045633 | 0.103340          | -937.3012233 |
| (NA) <sub>3</sub> (MA) <sub>2</sub>                   | -1033.153882 | 0.167825          | -1032.986057 |
| (NA) <sub>3</sub> (MA) <sub>3</sub>                   | -1128.896614 | 0.229390          | -1128.667224 |
| (SA) <sub>1</sub> (MA) <sub>1</sub>                   | -795.197688  | 0.072625          | -795.125063  |
| (SA) <sub>1</sub> (MA) <sub>2</sub>                   | -890.927571  | 0.132992          | -890.794579  |
| (SA) <sub>1</sub> (MA) <sub>3</sub>                   | -986.65875   | 0.19662           | -986.46213   |
| (SA) <sub>2</sub> (MA) <sub>1</sub>                   | -1494.709149 | 0.107431          | -1494.601718 |
| (SA) <sub>2</sub> (MA) <sub>2</sub>                   | -1590.454826 | 0.174314          | -1590.280512 |
| (SA) <sub>2</sub> (MA) <sub>3</sub>                   | -1686.183444 | 0.230949          | -1685.952495 |
| (SA) <sub>3</sub> (MA) <sub>1</sub>                   | -2194.208579 | 0.141184          | -2194.067395 |
| (SA) <sub>3</sub> (MA) <sub>2</sub>                   | -2289.963668 | 0.205543          | -2289.758125 |
| (SA) <sub>3</sub> (MA) <sub>3</sub>                   | -2385.716335 | 0.272156          | -2385.444179 |
| A                                                     | -56.48024907 | 0.015714          | -56.46453507 |
| SA                                                    | -699.4627499 | 0.011182          | -699.4515679 |
| MA                                                    | -95.705457   | 0.041861          | -95.663596   |
| NA                                                    | -280.5415393 | 0.00149           | -280.5400493 |
| DMA                                                   | -134.9377016 | 0.067928          | -134.8697736 |
| (NA) <sub>1</sub> (DMA) <sub>1</sub>                  | -415.5057069 | 0.086285          | -415.4194219 |
| (NA) <sub>2</sub> (DMA) <sub>1</sub>                  | -696.0768686 | 0.110709          | -695.9661596 |
| (NA) <sub>2</sub> (DMA) <sub>2</sub>                  | -831.0648693 | 0.203255          | -830.8616143 |
| (NA) <sub>3</sub> (DMA) <sub>1</sub>                  | -976.6455726 | 0.133587          | -976.5119856 |
| (NA) <sub>3</sub> (DMA) <sub>2</sub>                  | -1111.634636 | 0.225008          | -1111.409628 |
| (NA) <sub>3</sub> (DMA) <sub>3</sub>                  | -1246.617857 | 0.317365          | -1246.300492 |



---

|                                                        |              |          |              |
|--------------------------------------------------------|--------------|----------|--------------|
| (NA) <sub>1</sub> (SA) <sub>1</sub> (DMA) <sub>1</sub> | -1115.014974 | 0.124942 | -1114.890032 |
| (NA) <sub>1</sub> (SA) <sub>1</sub> (DMA) <sub>2</sub> | -1250.003162 | 0.215199 | -1249.787963 |
| (NA) <sub>2</sub> (SA) <sub>1</sub> (DMA) <sub>1</sub> | -1395.580433 | 0.145875 | -1395.434558 |
| (NA) <sub>1</sub> (SA) <sub>2</sub> (DMA) <sub>1</sub> | -1814.520062 | 0.157029 | -1814.363033 |
| (NA) <sub>2</sub> (SA) <sub>1</sub> (DMA) <sub>2</sub> | -1530.572935 | 0.238897 | -1530.334038 |
| (NA) <sub>1</sub> (SA) <sub>2</sub> (DMA) <sub>2</sub> | -1949.512551 | 0.252846 | -1949.259705 |
| (NA) <sub>2</sub> (SA) <sub>1</sub> (DMA) <sub>3</sub> | -1665.560968 | 0.332443 | -1665.228525 |
| (NA) <sub>1</sub> (SA) <sub>2</sub> (DMA) <sub>3</sub> | -2084.506775 | 0.343849 | -2084.162926 |
| (SA) <sub>1</sub> (DMA) <sub>1</sub>                   | -834.4400164 | 0.097619 | -834.3423974 |
| (SA) <sub>1</sub> (DMA) <sub>2</sub>                   | -969.4026559 | 0.186603 | -969.2160529 |
| (SA) <sub>1</sub> (DMA) <sub>3</sub>                   | -1104.36721  | 0.274966 | -1104.092244 |
| (SA) <sub>2</sub> (DMA) <sub>1</sub>                   | -1533.957122 | 0.133275 | -1533.823847 |
| (SA) <sub>2</sub> (DMA) <sub>2</sub>                   | -1668.942843 | 0.225894 | -1668.716949 |
| (SA) <sub>2</sub> (DMA) <sub>3</sub>                   | -1803.915673 | 0.316243 | -1803.59943  |
| (SA) <sub>3</sub> (DMA) <sub>1</sub>                   | -2233.461148 | 0.168265 | -2233.292883 |
| (SA) <sub>3</sub> (DMA) <sub>2</sub>                   | -2368.455641 | 0.259809 | -2368.195832 |
| (SA) <sub>3</sub> (DMA) <sub>3</sub>                   | -2503.444982 | 0.351638 | -2503.093344 |
| (SA) <sub>1</sub> (A) <sub>1</sub>                     | -755.9664372 | 0.044667 | -755.9217702 |
| (SA) <sub>2</sub> (A) <sub>1</sub>                     | -1455.473432 | 0.080691 | -1455.392741 |
| (SA) <sub>2</sub> (A) <sub>2</sub>                     | -1511.983413 | 0.116992 | -1511.866421 |
| (SA) <sub>3</sub> (A) <sub>1</sub>                     | -2154.965927 | 0.111125 | -2154.854802 |
| (SA) <sub>3</sub> (A) <sub>2</sub>                     | -2211.48869  | 0.149758 | -2211.338932 |
| (SA) <sub>3</sub> (A) <sub>3</sub>                     | -2268.009283 | 0.189116 | -2267.820167 |
| (NA) <sub>1</sub> (A) <sub>1</sub>                     | -337.0435125 | 0.0342   | -337.0093125 |
| (NA) <sub>2</sub> (A) <sub>1</sub>                     | -617.6009034 | 0.056902 | -617.5440014 |
| (NA) <sub>2</sub> (A) <sub>2</sub>                     | -674.1139883 | 0.094983 | -674.0190053 |
| (NA) <sub>3</sub> (A) <sub>1</sub>                     | -898.1670092 | 0.076699 | -898.0903102 |
| (NA) <sub>3</sub> (A) <sub>2</sub>                     | -954.6809968 | 0.113803 | -954.5671938 |
| (NA) <sub>3</sub> (A) <sub>3</sub>                     | -1011.191101 | 0.152253 | -1011.038848 |
| (NA) <sub>1</sub> (SA) <sub>1</sub> (A) <sub>1</sub>   | -1036.535387 | 0.063602 | -1036.471785 |
| (NA) <sub>1</sub> (SA) <sub>1</sub> (A) <sub>2</sub>   | -1093.052076 | 0.104441 | -1092.947635 |
| (NA) <sub>2</sub> (SA) <sub>1</sub> (A) <sub>1</sub>   | -1317.108675 | 0.088228 | -1317.020447 |
| (NA) <sub>2</sub> (SA) <sub>1</sub> (A) <sub>2</sub>   | -1373.623326 | 0.130638 | -1373.492688 |
| (NA) <sub>2</sub> (SA) <sub>1</sub> (A) <sub>3</sub>   | -1430.144519 | 0.1702   | -1429.974319 |
| (NA) <sub>1</sub> (SA) <sub>2</sub> (A) <sub>1</sub>   | -1736.044683 | 0.100882 | -1735.943801 |
| (NA) <sub>1</sub> (SA) <sub>2</sub> (A) <sub>2</sub>   | -1792.561856 | 0.143387 | -1792.418469 |
| (NA) <sub>1</sub> (SA) <sub>2</sub> (A) <sub>3</sub>   | -1849.083343 | 0.180341 | -1848.903002 |

---

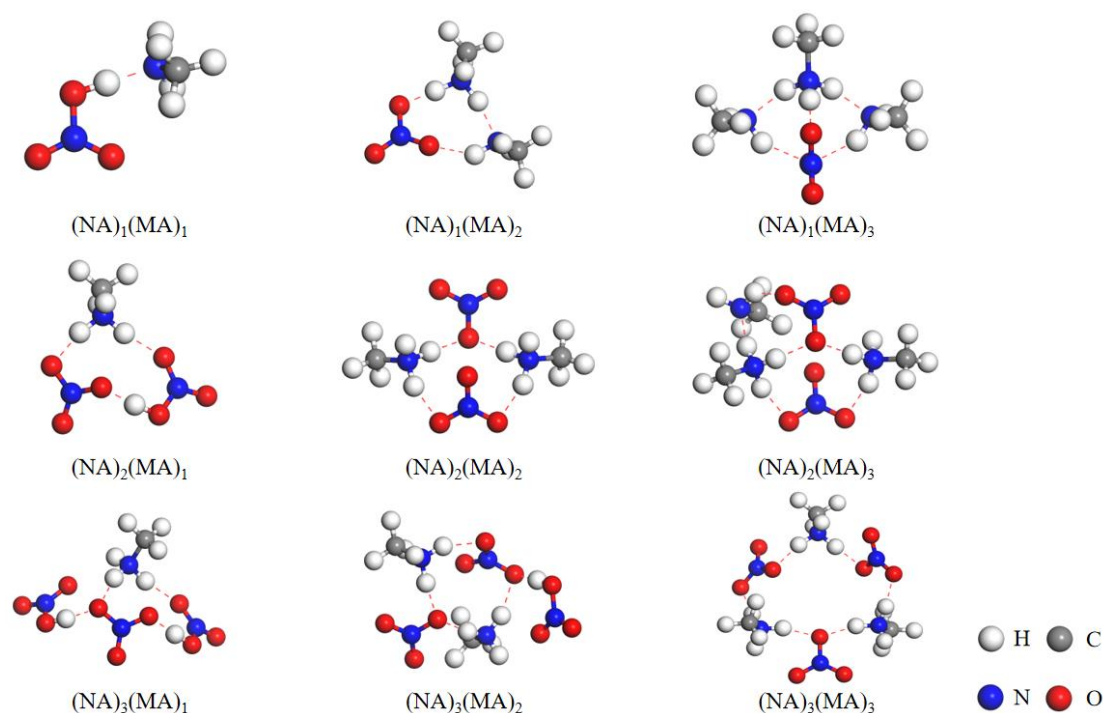

**Figure S1.** Lowest Gibbs free energy conformations of the  $(\text{NA})_{1-3}(\text{MA})_{1-3}$  clusters calculated at the DLPNO-CCSD(T)/aug-cc-pVTZ// $\omega\text{B97X-D}/6\text{-}31\text{++G(d,p)}$  level of theory, 298.15 K and 1 atm. The dashed red lines indicate hydrogen bonds.

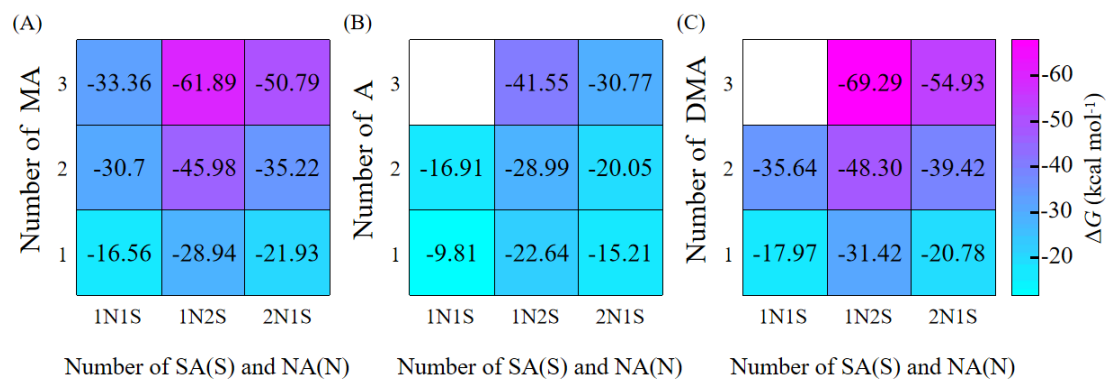

**Figure S2.** Formation free energy ( $\Delta G$ ) of (A)  $(\text{NA})_x(\text{SA})_y(\text{MA})_z$  ( $1 \leq x, 1 \leq y, x + y \leq 3, 1 \leq z \leq 3$ ), (B)  $(\text{NA})_x(\text{SA})_y(\text{A})_z$  ( $x \geq 1, y \geq 1, 1 \leq z \leq x + y \leq 3$ ) and (C)  $(\text{NA})_x(\text{SA})_y(\text{DMA})_z$  ( $x \geq 1, y \geq 1, 1 \leq z \leq x + y \leq 3$ ) clusters calculated at the DLPNO-CCSD(T)/aug-cc-pVTZ// $\omega\text{B97X-D}/6\text{-}31\text{++G(d,p)}$  level of theory, 298.15 K and 1 atm.

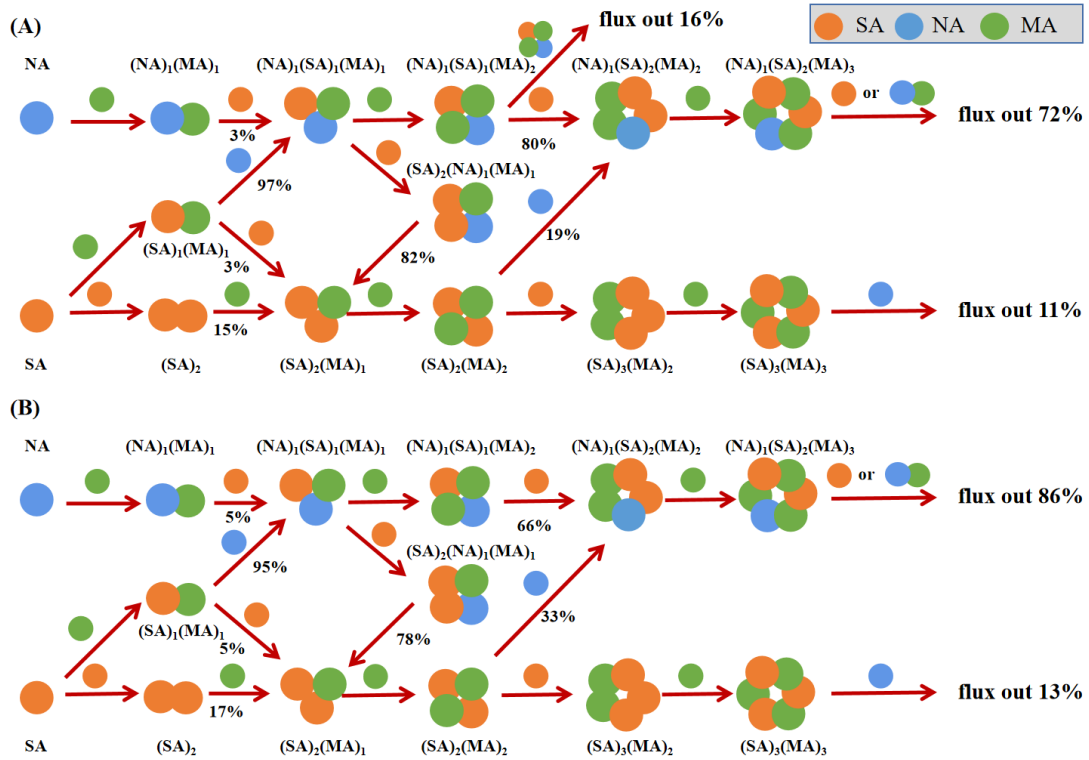

**Figure S3.** Cluster growth pathways for the NA-SA-MA system at (A) 238.15 K,  $[NA] = 10^{10}$  molecules  $\text{cm}^{-3}$ ,  $[SA] = 10^6$  molecules  $\text{cm}^{-3}$  and  $[MA] = 10^8$  molecules  $\text{cm}^{-3}$ , (B) 278.15 K,  $[NA] = 10^{12}$  molecules  $\text{cm}^{-3}$ ,  $[SA] = 10^6$  molecules  $\text{cm}^{-3}$  and  $[MA] = 10^8$  molecules  $\text{cm}^{-3}$ .
